# Supplementary material
Source: publisher site journal article supplement (https://www.dovepress.com/article/281955)
Supplement: Supplementary file 1 [file get_supplementary_file.php]

**Supplementary material**

**Structured Questionnaire English Version**

**Part I. Socio-demographic characteristics**

| **No.** | Questions | Response coding categories | skip to |
| --- | --- | --- | --- |
| 1. | How old are you? | …….years |  |
| 2. | Sex | 1. male  2. female |  |
| 3. | What is your current marital status? | 1. Married 2. Single 3. others |  |
| 4. | What is your religion? | 1. Orthodox 2. Protestant 3. Others specify…… |  |
| 5. | In which grade are you? | 1. Grade 11 2. Grade 12 |  |
| 6. | What is your ethnicity? | 1. Amhara 2. Oromo 3. Others specify……… |  |
| 7. | Residence | 1.urban  2.rural |  |
| 8 | Do you perceive yourself to be at risk of HIV infection? | 1.yes  2. no |  |
| 9 | Have you boy/girl friend? | 1.yes  2. no |  |
| 10 | Have you multiple sexual partners? | 1. Yes 2. No |  |
| 11 | Have you ever used drug injection practice? | 1. yes 2. no |  |

**Part II. Knowledge questions about VCT for HIV**

| 12 | Have you ever heard about VCT? | 1. yes 2. no |  |
| --- | --- | --- | --- |
| 13 | Do you know the place where VCT is provided? | 1. yes 2. no |  |
| 14 | Is VCT important for the prevention and control of HIV? | 1. yes 2. no |  |
| 15 | Do you know HIV test is conducted voluntarily? | 1. Yes 2. no |  |
| 16 | Do you know HIV testing is given with counseling? | 1. yes 2. no |  |

**Part III. Attitude and practice questions about VCT for HIV**

| 17 | Do you think VCT is necessary? | 1. Yes 2. No |  |
| --- | --- | --- | --- |
| 18 | Are you interested to undergo VCT? | 1. Yes 2. No |  |
| 19 | Do you advice friends to have VCT? | 1. Yes 2. No |  |
| 20 | Do you think VCT is only required for ill? | 1. Yes 2. No |  |
| 21 | Do you think VCT is required only for HIV like symptoms? | 1. Yes 2. No |  |
| 22 | Do you think VCT is necessary for starting new relationship? | 1. Yes 2. No |  |
| 23 | Have you ever tested for HIV? | 1. Yes 2. No |  |
